# Supplementary material for: Comparative Performance of Private Equity–Owned US Nursing Homes During the COVID-19 Pandemic
Source: PubMed Central journal article supplement (PMC7593807; doi:10.1001/jamanetworkopen.2020.26702), 2020-10-28
Supplement: jamanetwopen-e2026702-s001.pdf [file jamanetwopen-e2026702-s001.pdf]

## Supplemental Online Content

Braun RT, Yun H, Casalino LP, et al. Comparative performance of private equity–owned US nursing homes during the COVID-19 pandemic. *JAMA Netw Open*. 2020;3(10):e2026702. doi:10.1001/jamanetworkopen.2020.26702

**eAppendix.** Identification of Private Equity Nursing Home Acquisitions

**eTable 1.** Private Equity Acquisitions of Nursing Homes by State

**eFigure.** Sample Selection

**eTable 2.** Unadjusted COVID-19 Outcomes by Ownership for Nursing Homes That Did Not Pass CDC Quality Assurance Check

**eTable 3.** Unadjusted Means and Proportions of COVID-19 Resident Outcome Measures

**eTable 4.** Association Between COVID-19 Resident Outcomes and Nursing Home Characteristics

**eTable 5.** Association Between PPE Supply Outcomes and Nursing Home Characteristics

**eTable 6.** Association Between Staff Shortage Outcomes and Nursing Home Characteristics

**eTable 7.** Poisson Regression Estimates: Association Between COVID-19 Resident Outcomes and Ownership

**eTable 8.** Logistic Regression Estimates: Association Between PPE Supply/Staff Shortage Outcomes and Ownership

This supplemental material has been provided by the authors to give readers additional information about their work.

## eAppendix. Identification of Private Equity Nursing Home Acquisitions

Information on private equity (PE) acquisition of nursing homes from January 1, 2010 through February 5, 2020 was accessed from S&P Capital IQ and Irving Levin Associates Health Care M&A databases.<sup>1</sup> Acquisition data from Irving Levin Associates Health Care M&A included the name and a description of the acquired nursing home, city and state of the acquired facilities, name and business description of the acquirer, a description of the deal, and the announcement date of the deal. Acquisition data from S&P Capital IQ included the name and description of the acquired facility, name and business description of the acquirer, a description of the deal, and the announcement date of the deal.

Acquisitions from Irving Levin Associates and S&P Capital IQ databases were confirmed to be PE or a platform nursing home<sup>2</sup> by examining the acquirer's business description in both datasets. If the business description mentioned that the acquirer was a PE firm, raised capital to invest in companies that are not publicly traded, or a platform nursing home that was PE-backed, we considered this a PE acquisition. If we were unable to confirm a PE acquisition using the acquirer's business description in both datasets, we then examined the acquirer's business descriptions in CB Insights, Pitchbook, Bloomberg Businessweek, the acquirer's home website, and various web searches and news articles to confirm if they were a PE firm or platform nursing home.<sup>3</sup>

Confirmed acquisitions were then matched to their Centers for Medicare and Medicaid Services (CMS) Certification Number (CCN) by manually matching on facility name and geographic location from Provider of Services (POS) data across years 2010-2020. The CMS POS data contains all registered nursing homes in the United States and provides the facility name, address, and CCN. The CCN remains the same across years even if the ownership and/or name of the facility changes. For nursing home acquisitions that spanned multiple facilities in different geographic regions, we aggregated all facility locations in the POS files and matched them to all confirmed acquisitions.

After we confirmed PE acquisitions using S&P Capital IQ and Irving Levin Associates Health Care M&A databases, we used the CMS Nursing Home Compare ownership public use file to add additional PE acquisitions. This database provides ownership information for currently registered nursing homes in the United States. Facility information in this dataset included CCN, facility name, facility address, owner name,

---

<sup>1</sup> Nursing homes that were acquired prior to the study period (2000-2009) and were identified in the data were removed from the analysis (n=569).

<sup>2</sup> A platform nursing home is defined as the initial acquisition/investment that a PE firm uses to recruit more employees and acquire smaller nursing homes. After investment, the PE firm generally controls a majority of the economic and voting interest in the nursing home acquired by the platform nursing home, which allows it to restructure the facility's financial, governance, and operational arrangements.

<sup>3</sup> Some nursing homes were acquired multiple times by different PE firms. For these nursing homes, the date of the earliest transaction was considered to be that nursing home's PE acquisition date.

and the date on which ownership began. The date that ownership began was considered the acquisition date. PE-acquired nursing homes were identified by (1) searching ownership data for known PE firms and PE-backed platform nursing homes from our confirmed PE acquisitions in the S&P Capital IQ and Irving Levin Associates Health Care M&A databases and (2) performing targeted keyword searches for “partners,” “capital,” and “investment” and manually reviewing nursing home owners with those keywords in their names. Acquisitions that were not in our confirmed acquisition data were added to complete the PE acquisition database.

eTable 1. Private Equity Acquisitions of Nursing Homes by State

| state | Number of private equity acquisitions in the PE database | Number of private equity acquisitions in the dataset | Number of private equity acquisitions in the sample |
|-------|----------------------------------------------------------|------------------------------------------------------|-----------------------------------------------------|
| AL    | 12                                                       | 0                                                    | 0                                                   |
| AR    | 14                                                       | 0                                                    | 0                                                   |
| AZ    | 11                                                       | 0                                                    | 0                                                   |
| CA    | 171                                                      | 52                                                   | 30                                                  |
| CO    | 17                                                       | 0                                                    | 0                                                   |
| CT    | 21                                                       | 0                                                    | 0                                                   |
| DC    | 2                                                        | 0                                                    | 0                                                   |
| DE    | 8                                                        | 0                                                    | 0                                                   |
| FL    | 147                                                      | 99                                                   | 27                                                  |
| GA    | 15                                                       | 13                                                   | 10                                                  |
| HI    | 1                                                        | 1                                                    | 1                                                   |
| IA    | 13                                                       | 10                                                   | 4                                                   |
| ID    | 13                                                       | 10                                                   | 10                                                  |
| IL    | 40                                                       | 30                                                   | 6                                                   |
| IN    | 63                                                       | 37                                                   | 25                                                  |
| KS    | 49                                                       | 29                                                   | 15                                                  |
| KY    | 86                                                       | 68                                                   | 36                                                  |
| LA    | 3                                                        | 3                                                    | 2                                                   |
| MA    | 64                                                       | 23                                                   | 22                                                  |
| MD    | 43                                                       | 30                                                   | 27                                                  |
| ME    | 13                                                       | 10                                                   | 4                                                   |
| MI    | 52                                                       | 33                                                   | 5                                                   |
| MN    | 36                                                       | 20                                                   | 5                                                   |
| MO    | 31                                                       | 22                                                   | 2                                                   |
| MS    | 14                                                       | 14                                                   | 7                                                   |
| MT    | 6                                                        | 3                                                    | 3                                                   |
| NC    | 40                                                       | 38                                                   | 20                                                  |
| ND    | 3                                                        | 2                                                    | 0                                                   |
| NE    | 24                                                       | 12                                                   | 1                                                   |
| NH    | 23                                                       | 20                                                   | 9                                                   |
| NJ    | 58                                                       | 38                                                   | 33                                                  |
| NM    | 25                                                       | 20                                                   | 11                                                  |
| NV    | 10                                                       | 5                                                    | 1                                                   |
| NY    | 10                                                       | 5                                                    | 4                                                   |
| OH    | 128                                                      | 78                                                   | 30                                                  |

eTable 1. Private Equity Acquisitions of Nursing Homes by State

| state | Number of private equity acquisitions in the PE database | Number of private equity acquisitions in the dataset | Number of private equity acquisitions in the sample |
|-------|----------------------------------------------------------|------------------------------------------------------|-----------------------------------------------------|
| OK    | 28                                                       | 5                                                    | 4                                                   |
| OR    | 1                                                        | 0                                                    | 0                                                   |
| PA    | 133                                                      | 103                                                  | 21                                                  |
| RI    | 11                                                       | 8                                                    | 8                                                   |
| SC    | 12                                                       | 10                                                   | 3                                                   |
| SD    | 20                                                       | 16                                                   | 2                                                   |
| TN    | 43                                                       | 39                                                   | 20                                                  |
| TX    | 116                                                      | 62                                                   | 39                                                  |
| UT    | 15                                                       | 8                                                    | 7                                                   |
| VA    | 38                                                       | 33                                                   | 20                                                  |
| VT    | 11                                                       | 10                                                   | 7                                                   |
| WA    | 24                                                       | 20                                                   | 18                                                  |
| WI    | 42                                                       | 27                                                   | 10                                                  |
| WV    | 52                                                       | 45                                                   | 33                                                  |
| WY    | 1                                                        | 1                                                    | 1                                                   |
| Total | 1813                                                     | 1112                                                 | 543                                                 |

eFigure. Sample Selection

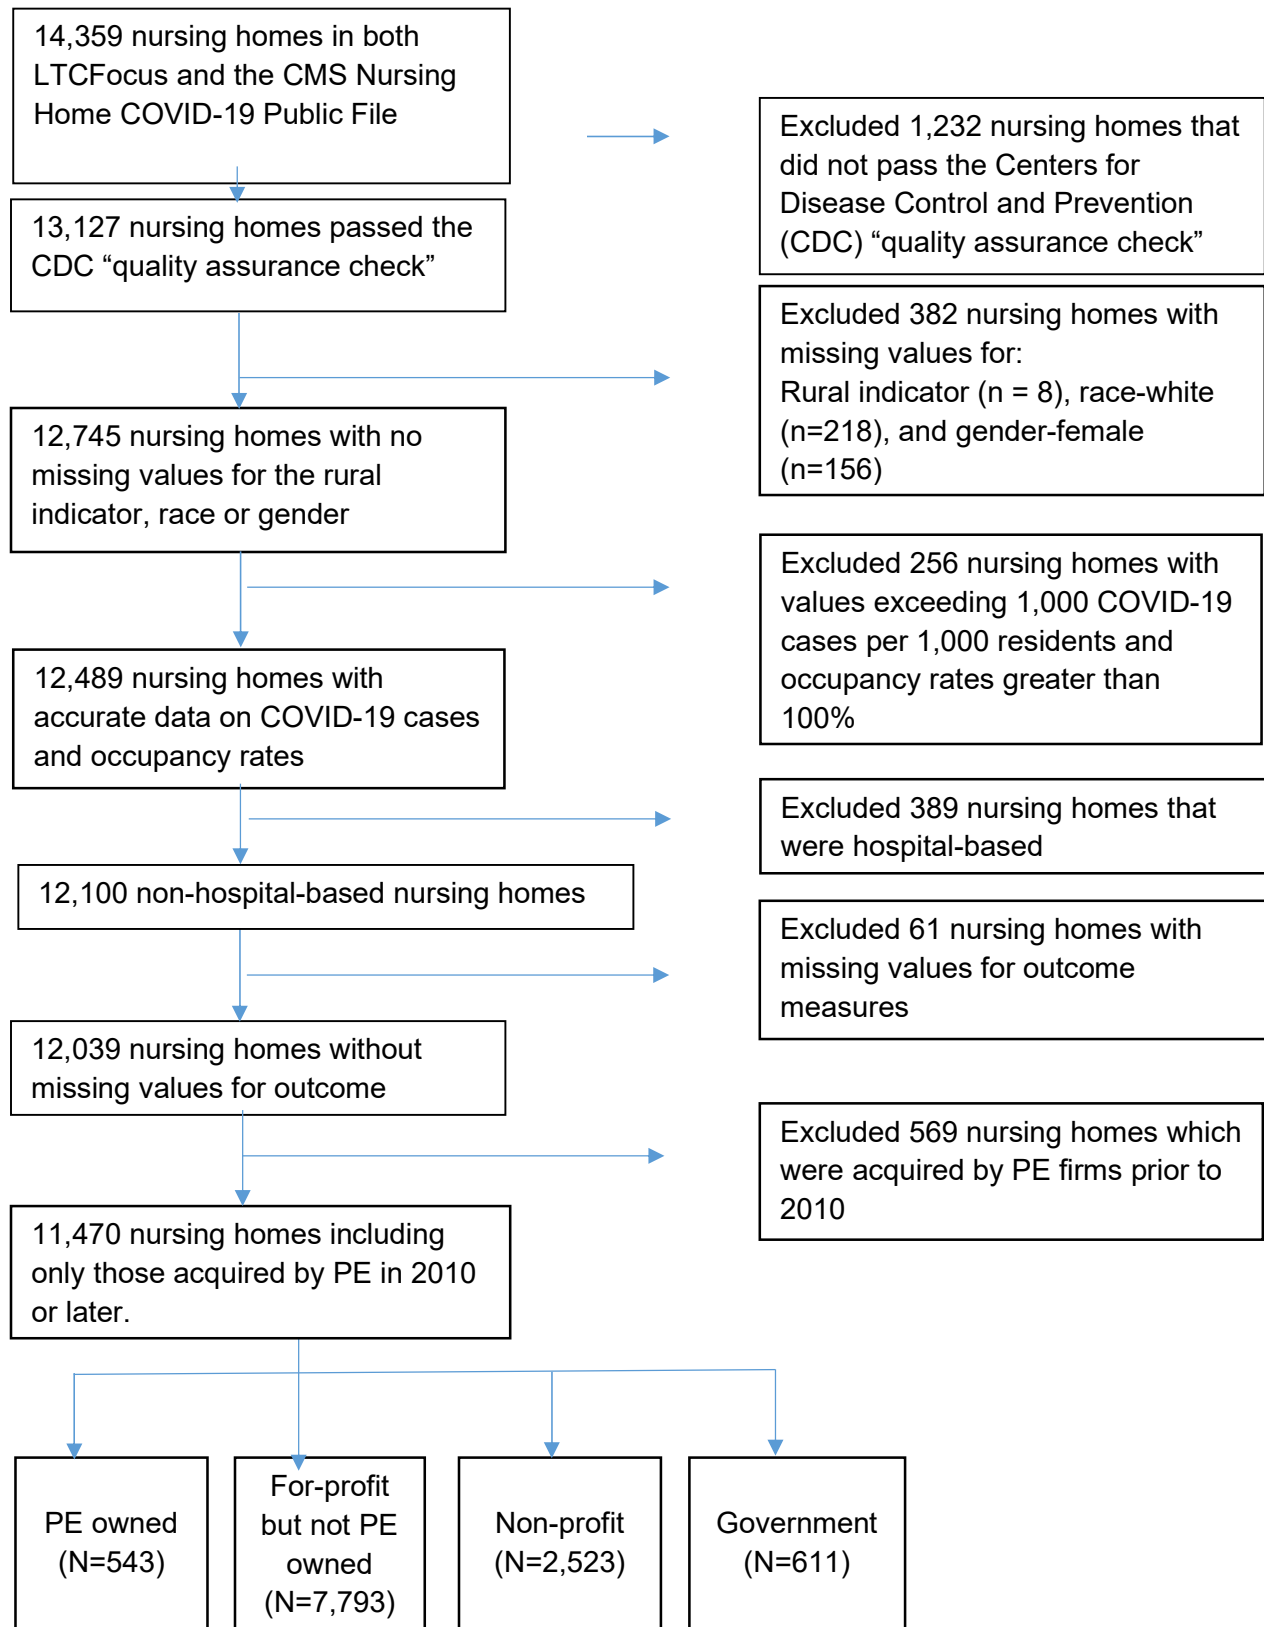

eTable 2. Unadjusted COVID-19 Outcomes by Ownership for Nursing Homes That Did Not Pass CDC Quality Assurance Check

| Outcome                                     | For-profit, excluding private equity (N = 187) | Private equity (N = 9) | Non-profit (N = 50) | Government (N = 11) | P Value |
|---------------------------------------------|------------------------------------------------|------------------------|---------------------|---------------------|---------|
| <i>Resident COVID-19 Measures</i>           |                                                |                        |                     |                     |         |
| COVID confirmed cases – per 1,000 residents | 217.58                                         | 256.61                 | 260.24              | 288.65              | 0.698   |
| COVID deaths – per 1,000 residents          | 30.6                                           | 38.83                  | 28.04               | 61.64               | 0.755   |
| All deaths – per 1,000 residents            | 52.09                                          | 92.52                  | 47.72               | 85.10               | 0.693   |
| <i>PPE Supply Measures</i>                  |                                                |                        |                     |                     |         |
| One-week supply of N95 masks – no. (%)      | 171 (91.44)                                    | 8 (88.89)              | 50 (100.00)         | 9 (81.82)           | 0.093   |
| One-week supply of surgical masks – no. (%) | 179 (95.72)                                    | 9 (100.00)             | 48 (96.00)          | 10 (90.91)          | 0.793   |
| One-week supply of eye protection – no. (%) | 178 (95.19)                                    | 8 (88.89)              | 49 (98.00)          | 11 (100.00)         | 0.516   |
| One-week supply of gowns – no. (%)          | 172 (91.98)                                    | 8 (88.89)              | 46 (92.00)          | 9 (81.82)           | 0.690   |
| One-week supply of gloves – no. (%)         | 179 (95.72)                                    | 9 (100.00)             | 50 (100.00)         | 11 (100.00)         | 0.378   |
| One-week supply of hand sanitizer – no. (%) | 180 (96.26)                                    | 9 (100.00)             | 49 (98.00)          | 8 (72.73)           | 0.002   |
| <i>Staff Shortage Measures</i>              |                                                |                        |                     |                     |         |
| Shortage of nursing staff – no. (%)         | 40 (21.39)                                     | 0 (0.00)               | 10 (20.00)          | 2 (18.18)           | 0.481   |

eTable 2. Unadjusted COVID-19 Outcomes by Ownership for Nursing Homes That Did Not Pass CDC Quality Assurance Check

| Outcome                              | For-profit, excluding private equity (N = 187) | Private equity (N = 9) | Non-profit (N = 50) | Government (N = 11) | P Value |
|--------------------------------------|------------------------------------------------|------------------------|---------------------|---------------------|---------|
| Shortage of clinical staff – no. (%) | 5 (2.67)                                       | 0 (0.00)               | 4 (8.00)            | 0 (0.00)            | 0.251   |
| Shortage of aides – no. (%)          | 47 (25.13)                                     | 1 (11.11)              | 11 (22.00)          | 1 (9.09)            | 0.496   |
| Shortage of other staff – no. (%)    | 19 (10.16)                                     | 0 (0.00)               | 7 (14.00)           | 0 (0.00)            | 0.379   |

Abbreviations: PPE, personal protective equipment

We made unadjusted comparisons of outcome measures by ownership category using one-way analysis of variance (ANOVA) for Resident COVID-19 Measures and Chi-square tests for PPE supply and staff shortage measures.

Outcome measures are from the CMS Nursing Home COVID-19 Public File as of July 2, 2020.



**eTable 3. Unadjusted Means and Proportions of COVID-19 Resident Outcome Measures**

| <b>Outcome</b>                                       | <b>Unadjusted Mean</b> |
|------------------------------------------------------|------------------------|
| <i>Resident COVID-19 Measures</i>                    |                        |
| COVID confirmed cases per 1,000 residents            | 82.1                   |
| COVID deaths per 1,000 residents                     | 63.5                   |
| All deaths per 1,000 residents                       | 80.9                   |
| <i>Personal Protection Equipment Supply Measures</i> |                        |
| One-week supply of N95 masks (%)                     | 86.7%                  |
| One-week supply of surgical masks (%)                | 93.8%                  |
| One-week supply of eye protection (%)                | 94.0%                  |
| One-week supply of gowns (%)                         | 87.8%                  |
| One-week supply of gloves (%)                        | 96.1%                  |
| One-week supply of hand sanitizer (%)                | 95.2%                  |
| <i>Staff Shortage Measures</i>                       |                        |
| Shortage of nursing staff (%)                        | 15.1%                  |
| Shortage of clinical staff (%)                       | 2.8%                   |
| Shortage of aides (%)                                | 17.6%                  |
| Shortage of other staff (%)                          | 9.0%                   |
| Abbreviations: PPE, personal protective equipment    |                        |

eTable 4. Association Between COVID-19 Resident Outcomes and Nursing Home Characteristics

| Predictor          | COVID confirmed cases, per 1,000 residents |         | COVID deaths, per 1,000 residents |         | All deaths, per 1,000 residents |         |
|--------------------|--------------------------------------------|---------|-----------------------------------|---------|---------------------------------|---------|
|                    | Risk estimate (95% CI)                     | P Value | Risk estimate (95% CI)            | P Value | Risk estimate (95% CI)          | P Value |
| Ownership status   |                                            |         |                                   |         |                                 |         |
| For-profit         | -18.2 (-49.4 – 13.0)                       | 0.734   | 5.3 (-27.4 – 16.9)                | 1.000   | 9.0 (-22.4 – 4.3)               | 0.443   |
| Non-Profit         | -25.6 (-57.4 – 6.2)                        | 0.198   | -8.9 (-32.0 – 14.1)               | 1.000   | -4.6 (-18.4 – 9.2)              | 1.000   |
| Government         | -35.5 (-69.2 – -1.8)                       | 0.033   | -6.7 (-35.01 – 21.7)              | 1.000   | -8.9 (-25.1 – 7.4)              | 0.892   |
| Total beds         |                                            |         |                                   |         |                                 |         |
| Middle tercile     | 18.8 (10.2 – 27.4)                         | < 0.001 | -1.4 (-8.8 – 5.9)                 | 0.702   | 7.56 (1.9 – 13.2)               | 0.009   |
| Highest tercile    | 29.4 (18.4 – 40.3)                         | < 0.001 | -6.3 (-14.0 – 1.4)                | 0.108   | 12.0 (5.5 – 18.5)               | < 0.001 |
| Occupancy rate     | -3.2 (-3.6 – -2.7)                         | < 0.001 | -2.3 (-2.5 – -2.1)                | < 0.001 | -1.6 (-1.8 – -1.4)              | < 0.001 |
| Patient age        | 0.7 (0.1 – 1.3)                            | 0.027   | 0.7 (0.2 – 1.3)                   | 0.012   | 1.2 (0.8 – 1.7)                 | < 0.001 |
| % female residents | 0.02 (-0.4 – 0.4)                          | 0.926   | -0.1 (-0.4 – 0.3)                 | 0.720   | 0.2 (-0.1 – 0.4)                | 0.211   |
| % white residents  |                                            |         |                                   |         |                                 |         |
| Middle tercile     | -22.5 (-32.9 – -12.0)                      | < 0.001 | -1.7 (-8.1 – 4.6)                 | 0.590   | 2.0 (-3.9 – 7.8)                | 0.506   |

eTable 4. Association Between COVID-19 Resident Outcomes and Nursing Home Characteristics

| Predictor                       | COVID confirmed cases, per 1,000 residents |         | COVID deaths, per 1,000 residents |         | All deaths, per 1,000 residents |         |
|---------------------------------|--------------------------------------------|---------|-----------------------------------|---------|---------------------------------|---------|
|                                 | Risk estimate (95% CI)                     | P Value | Risk estimate (95% CI)            | P Value | Risk estimate (95% CI)          | P Value |
| Highest tercile                 | -33.6 (-45.9 – -21.3)                      | < 0.001 | 2.5 (-6.4 – 11.3)                 | 0.583   | 2.3 (-5.7 – 10.3)               | 0.568   |
| % Medicare residents            |                                            |         |                                   |         |                                 |         |
| Middle tercile                  | -1.3 (-8.6 – 6.00)                         | 0.729   | 5.5 (-0.8 – 11.8)                 | 0.087   | 2.2 (-2.8 – 7.1)                | 0.395   |
| Highest tercile                 | -7.3 (-17.0 – 2.3)                         | 0.136   | -4.6 (-11.2 – 2.1)                | 0.177   | -3.3 (-8.7 – 2.3)               | 0.244   |
| % Medicaid residents            |                                            |         |                                   |         |                                 |         |
| Middle tercile                  | 7.6 (-1.2 – 16.4)                          | 0.091   | 8.4 (1.9 – 14.8)                  | 0.011   | -1.5 (-7.3 – 4.3)               | 0.610   |
| Highest tercile                 | 7.8 (-2.7 – 18.3)                          | 0.145   | 11.7 (4.5 – 18.9)                 | 0.002   | -2.5 (-9.0 – 3.9)               | 0.439   |
| Mean ADL score                  | 0.5 (-0.8 – 1.8)                           | 0.443   | 0.7 (-0.5 – 2.0)                  | 0.254   | 1.9 (1.1 – 2.7)                 | < 0.001 |
| Multi-Facility Chain Membership | 3.4 (-4.6 – 11.3)                          | 0.404   | 0.4 (-5.4 – 6.1)                  | 0.904   | -1.6 (-6.3 – 3.2)               | 0.512   |
| Rural                           | -15.6 (-26.1 – -5.0)                       | 0.004   | -19.5 (-34.7 – -4.3)              | 0.012   | -15.9 (-23.1 – -8.6)            | < 0.001 |

Abbreviations: CI, confidence interval; ADL, Activities of daily living

Results presented as difference in percentage points.

Bonferroni correction was used for multiple comparisons.

Standard errors were adjusted for clustering at the level of the Hospital Referral Region.

eTable 5. Association Between PPE Supply Outcomes and Nursing Home Characteristics

|                  | One-week supply of N95 masks |         | One-week supply of surgical masks |         | One-week supply of eye protection |         | One-week supply of gowns |         | One-week supply of gloves |         | One-week supply of hand sanitizer |         |
|------------------|------------------------------|---------|-----------------------------------|---------|-----------------------------------|---------|--------------------------|---------|---------------------------|---------|-----------------------------------|---------|
| Predictor        | Estimate (95% CI)            | P Value | Estimate (95% CI)                 | P Value | Estimate (95% CI)                 | P Value | Estimate (95% CI)        | P Value | Estimate (95% CI)         | P Value | Estimate (95% CI)                 | P Value |
| Ownership status |                              |         |                                   |         |                                   |         |                          |         |                           |         |                                   |         |
| For-profit       | 9.1 (1.8 – 16.3)             | 0.006   | 1.6 (-6.2 – 3.1)                  | 1.000   | -0.1 (-4.7 – 4.5)                 | 1.000   | 21.3 (11.8 – 30.8)       | < 0.001 | 1.6 (-2.5 – 5.7)          | 1.000   | 1.0 (-3.2 – 5.3)                  | 1.000   |
| Non-Profit       | 13.0 (5.5 – 20.6)            | <0.001  | 2.5 (-2.3 – 7.3)                  | 1.000   | 3.7 (-1.2 – 8.6)                  | 0.288   | 27.0 (17.7 – 36.2)       | < 0.001 | 3.0 (-1.3 – 7.2)          | 0.386   | 2.7 (-1.8 – 7.3)                  | 0.650   |
| Government       | 14.8 (6.5 – 23.0)            | < 0.001 | 2.4 (-3.0 – 7.8)                  | 1.000   | 2.3 (-3.2 – 7.8)                  | 1.000   | 25.7 (16.1 – 35.3)       | < 0.001 | 3.3 (-1.0 – 7.7)          | 0.252   | 1.8 (-3.4 – 6.9)                  | 1.000   |

eTable 5. Association Between PPE Supply Outcomes and Nursing Home Characteristics

| Predictor       | One-week supply of N95 masks |         | One-week supply of surgical masks |         | One-week supply of eye protection |         | One-week supply of gowns |         | One-week supply of gloves |         | One-week supply of hand sanitizer |         |
|-----------------|------------------------------|---------|-----------------------------------|---------|-----------------------------------|---------|--------------------------|---------|---------------------------|---------|-----------------------------------|---------|
|                 | Estimate (95% CI)            | P Value | Estimate (95% CI)                 | P Value | Estimate (95% CI)                 | P Value | Estimate (95% CI)        | P Value | Estimate (95% CI)         | P Value | Estimate (95% CI)                 | P Value |
| Total beds      |                              |         |                                   |         |                                   |         |                          |         |                           |         |                                   |         |
| Middle tercile  | -0.01 (-0.03 – 0.00)         | 0.135   | -0.01 (-0.02 – 0.00)              | 0.085   | -0.02 (-0.03 – 0.00)              | 0.010   | -0.03 (-0.04 – -0.01)    | 0.005   | -0.01 (-0.02 – 0.00)      | 0.105   | -0.01 (-0.02 – 0.00)              | 0.019   |
| Highest tercile | -0.02 (-0.04 – 0.00)         | 0.029   | 0.00 (-0.02 – 0.01)               | 0.595   | -0.01 (-0.03 – 0.00)              | 0.042   | -0.03 (-0.05 – -0.02)    | < 0.001 | -0.01 (-0.02 – 0.00)      | 0.227   | -0.01 (-0.02 – 0.00)              | 0.182   |

eTable 5. Association Between PPE Supply Outcomes and Nursing Home Characteristics

| Predictor          | One-week supply of N95 masks |         | One-week supply of surgical masks |         | One-week supply of eye protection |         | One-week supply of gowns |         | One-week supply of gloves |         | One-week supply of hand sanitizer |         |
|--------------------|------------------------------|---------|-----------------------------------|---------|-----------------------------------|---------|--------------------------|---------|---------------------------|---------|-----------------------------------|---------|
|                    | Estimate (95% CI)            | P Value | Estimate (95% CI)                 | P Value | Estimate (95% CI)                 | P Value | Estimate (95% CI)        | P Value | Estimate (95% CI)         | P Value | Estimate (95% CI)                 | P Value |
| Occupancy rate     | 0.00 (0.00 – 0.00)           | 0.695   | 0.00 (0.00 – 0.00)                | 0.875   | 0.00 (0.00 – 0.00)                | 0.270   | 0.00 (0.00 – 0.00)       | 0.491   | 0.00 (0.00 – 0.00)        | 0.105   | 0.00 (0.00 – 0.00)                | 0.556   |
| Patient age        | 0.00 (0.00 – 0.00)           | 0.750   | 0.00 (0.00 – 0.00)                | 0.306   | 0.00 (0.00 – 0.00)                | 0.016   | 0.00 (0.00 – 0.00)       | 0.068   | 0.00 (0.00 – 0.00)        | 0.921   | 0.00 (0.00 – 0.00)                | 0.789   |
| % female residents | 0.00 (0.00 – 0.00)           | 0.147   | 0.00 (0.00 – 0.00)                | 0.628   | 0.00 (0.00 – 0.00)                | 0.935   | 0.00 (0.00 – 0.00)       | 0.214   | 0.00 (0.00 – 0.00)        | 0.874   | 0.00 (0.00 – 0.00)                | 0.873   |

eTable 5. Association Between PPE Supply Outcomes and Nursing Home Characteristics

| Predictor            | One-week supply of N95 masks |         | One-week supply of surgical masks |         | One-week supply of eye protection |         | One-week supply of gowns |         | One-week supply of gloves |         | One-week supply of hand sanitizer |         |
|----------------------|------------------------------|---------|-----------------------------------|---------|-----------------------------------|---------|--------------------------|---------|---------------------------|---------|-----------------------------------|---------|
|                      | Estimate (95% CI)            | P Value | Estimate (95% CI)                 | P Value | Estimate (95% CI)                 | P Value | Estimate (95% CI)        | P Value | Estimate (95% CI)         | P Value | Estimate (95% CI)                 | P Value |
| % white residents    |                              |         |                                   |         |                                   |         |                          |         |                           |         |                                   |         |
| Middle tercile       | 0.01 (-0.01 – 0.03)          | 0.507   | 0.01 (-0.01 – 0.02)               | 0.374   | 0.00 (-0.01 – 0.02)               | 0.894   | -0.01 (-0.03 – 0.01)     | 0.206   | 0.01 (0.00 – 0.02)        | 0.260   | 0.00 (-0.02 – 0.01)               | 0.490   |
| Highest tercile      | 0.00 (-0.03 – 0.03)          | 0.943   | 0.00 (-0.02 – 0.01)               | 0.624   | -0.01 (-0.03 – 0.01)              | 0.343   | -0.01 (-0.04 – 0.01)     | 0.369   | 0.00 (-0.01 – 0.02)       | 0.733   | -0.01 (-0.03 – 0.01)              | 0.263   |
| % Medicare residents |                              |         |                                   |         |                                   |         |                          |         |                           |         |                                   |         |

eTable 5. Association Between PPE Supply Outcomes and Nursing Home Characteristics

| Predictor            | One-week supply of N95 masks |         | One-week supply of surgical masks |         | One-week supply of eye protection |         | One-week supply of gowns |         | One-week supply of gloves |         | One-week supply of hand sanitizer |         |
|----------------------|------------------------------|---------|-----------------------------------|---------|-----------------------------------|---------|--------------------------|---------|---------------------------|---------|-----------------------------------|---------|
|                      | Estimate (95% CI)            | P Value | Estimate (95% CI)                 | P Value | Estimate (95% CI)                 | P Value | Estimate (95% CI)        | P Value | Estimate (95% CI)         | P Value | Estimate (95% CI)                 | P Value |
| Middle tercile       | 0.01 (-0.01 – 0.02)          | 0.420   | 0.00 (-0.01 – 0.01)               | 0.735   | 0.00 (-0.01 – 0.01)               | 0.867   | 0.00 (-0.01 – 0.02)      | 0.727   | 0 (-0.01 – 0.00)          | 0.409   | 0.00 (-0.01 – 0.01)               | 0.555   |
| Highest tercile      | -0.01 (-0.03 – 0.01)         | 0.390   | -0.02 (-0.03 – 0.00)              | 0.013   | -0.01 (-0.02 – 0.01)              | 0.271   | -0.01 (-0.03 – 0.01)     | 0.276   | -0.01 (-0.02 – 0.00)      | 0.184   | -0.01 (-0.02 – 0.00)              | 0.208   |
| % Medicaid residents |                              |         |                                   |         |                                   |         |                          |         |                           |         |                                   |         |



eTable 5. Association Between PPE Supply Outcomes and Nursing Home Characteristics

|                 | One-week supply of N95 masks |         | One-week supply of surgical masks |         | One-week supply of eye protection |         | One-week supply of gowns |         | One-week supply of gloves |         | One-week supply of hand sanitizer |         |
|-----------------|------------------------------|---------|-----------------------------------|---------|-----------------------------------|---------|--------------------------|---------|---------------------------|---------|-----------------------------------|---------|
| Predictor       | Estimate (95% CI)            | P Value | Estimate (95% CI)                 | P Value | Estimate (95% CI)                 | P Value | Estimate (95% CI)        | P Value | Estimate (95% CI)         | P Value | Estimate (95% CI)                 | P Value |
| Middle tercile  | -0.01 (-0.03 – 0.00)         | 0.099   | -0.01 (-0.02 – -0.01)             | 0.247   | -0.01 (-0.02 – -0.00)             | 0.157   | -0.01 (-0.03 – -0.01)    | 0.178   | -0.01 (-0.02 – 0.00)      | 0.033   | -0.01 (-0.02 – 0.00)              | 0.154   |
| Highest tercile | -0.01 (-0.03 – 0.01)         | 0.492   | 0.00 (-0.02 – 0.02)               | 0.945   | -0.01 (-0.02 – -0.01)             | 0.422   | 0.00 (-0.02 – -0.02)     | 0.785   | -0.01 (-0.02 – 0.01)      | 0.219   | -0.01 (-0.02 – 0.01)              | 0.409   |
| Mean ADL score  | 0.00 (0.00 – -0.00)          | 0.574   | 0.00 (0.00 – 0.00)                | 0.705   | 0.00 (0.00 – 0.00)                | 0.523   | 0.00 (0.00 – 0.00)       | 0.355   | 0.00 (0.00 – 0.00)        | 0.871   | 0.00 (0.00 – 0.00)                | 0.625   |

eTable 5. Association Between PPE Supply Outcomes and Nursing Home Characteristics

|                                 | One-week supply of N95 masks |         | One-week supply of surgical masks |         | One-week supply of eye protection |         | One-week supply of gowns |         | One-week supply of gloves |         | One-week supply of hand sanitizer |         |
|---------------------------------|------------------------------|---------|-----------------------------------|---------|-----------------------------------|---------|--------------------------|---------|---------------------------|---------|-----------------------------------|---------|
| Predictor                       | Estimate (95% CI)            | P Value | Estimate (95% CI)                 | P Value | Estimate (95% CI)                 | P Value | Estimate (95% CI)        | P Value | Estimate (95% CI)         | P Value | Estimate (95% CI)                 | P Value |
| Multi-Facility Chain Membership | -0.01 (-0.03 – 0.00)         | 0.054   | 0.00 (-0.01 – 0.01)               | 0.522   | -0.01 (-0.01 – 0.00)              | 0.325   | -0.02 (-0.03 – 0.00)     | 0.019   | 0.00 (-0.01 – 0.01)       | 0.607   | -0.01 (-0.01 – 0.00)              | 0.259   |
| Rural                           | -0.01 (-0.04 – 0.01)         | 0.330   | -0.01 (-0.03 – 0.01)              | 0.486   | -0.01 (-0.03 – 0.01)              | 0.273   | -0.02 (-0.05 – 0.01)     | 0.109   | 0.00 (-0.02 – 0.01)       | 0.558   | -0.01 (-0.02 – 0.01)              | 0.509   |

Abbreviations: CI, confidence interval; PPE, personal protective equipment; ADL, Activities of daily living  
 Results presented as difference in percentage points.  
 Bonferroni correction was used for multiple comparisons.  
 Standard errors were adjusted for clustering at the level of the Hospital Referral Region.

eTable 6. Association Between Staff Shortage Outcomes and Nursing Home Characteristics

|                      | Shortage of nursing staff |         | Shortage of clinical staff |         | Shortage of aides  |         | Shortage of other staff |         |
|----------------------|---------------------------|---------|----------------------------|---------|--------------------|---------|-------------------------|---------|
| Predictor            | Estimate (95% CI)         | P Value | Estimate (95% CI)          | P Value | Estimate (95% CI)  | P Value | Estimate (95% CI)       | P Value |
| Ownership status (%) |                           |         |                            |         |                    |         |                         |         |
| For-profit           | 3.2 (-1.4 – 7.7)          | 0.405   | 0.3 (-1.5 – 2.1)           | 1.000   | 3.2 (-2.4 – 8.8)   | 0.788   | 1.0 (-2.6 – 4.7)        | 1.000   |
| Non-Profit           | 1.0 (-4.0 – 6.0)          | 1.000   | 0.02 (-2.02 – 2.1)         | 1.000   | 1.0 (-5.4 – 7.3)   | 1.000   | 0.3 (-3.6 – 4.1)        | 1.000   |
| Government           | 6.9 (0.02 – 13.9)         | 0.049   | -0.2 (-3.0 – 2.7)          | 1.000   | 4.7 (-2.9 – 12.2)  | 0.601   | 2.5 (-2.6 – 7.7)        | 1.000   |
| Total beds           |                           |         |                            |         |                    |         |                         |         |
| Middle tercile       | 0.02 (0.00 – 0.03)        | 0.070   | 0.01 (0.00 – 0.01)         | 0.135   | 0.03 (0.01 – 0.05) | 0.010   | 0.01 (0.00 – 0.03)      | 0.082   |
| Highest tercile      | 0.02 (-0.01 – 0.04)       | 0.159   | 0.00 (-0.01 – 0.01)        | 0.443   | 0.03 (0.01 – 0.06) | 0.005   | 0.01 (-0.01 – 0.03)     | 0.202   |

eTable 6. Association Between Staff Shortage Outcomes and Nursing Home Characteristics

|                    | Shortage of nursing staff |         | Shortage of clinical staff |         | Shortage of aides   |         | Shortage of other staff |         |
|--------------------|---------------------------|---------|----------------------------|---------|---------------------|---------|-------------------------|---------|
| Predictor          | Estimate (95% CI)         | P Value | Estimate (95% CI)          | P Value | Estimate (95% CI)   | P Value | Estimate (95% CI)       | P Value |
| Occupancy rate     | 0.00 (0.00 – 0.00)        | 0.016   | 0.00 (0.00 – 0.00)         | 0.079   | 0.00 (0.00 – 0.00)  | 0.295   | 0.00 (0.00 – 0.00)      | 0.008   |
| Patient age        | 0.00 (0.00 – 0.00)        | 0.167   | 0.00 (0.00 – 0.00)         | 0.848   | 0.00 (0.00 – 0.00)  | 0.775   | 0.00 (0.00 – 0.00)      | 0.572   |
| % female residents | 0.00 (0.00 – 0.00)        | 0.788   | 0.00 (0.00 – 0.00)         | 0.605   | 0.00 (0.00 – 0.00)  | 0.811   | 0.00 (0.00 – 0.00)      | 0.388   |
| % white residents  |                           |         |                            |         |                     |         |                         |         |
| Middle tercile     | 0.00 (-0.02 – 0.02)       | 0.986   | 0.00 (-0.01 – 0.01)        | 0.948   | 0.00 (-0.02 – 0.03) | 0.853   | 0 (-0.02 – 0.01)        | 0.687   |

eTable 6. Association Between Staff Shortage Outcomes and Nursing Home Characteristics

|                         | Shortage of nursing staff |         | Shortage of clinical staff |         | Shortage of aides         |         | Shortage of other staff   |         |
|-------------------------|---------------------------|---------|----------------------------|---------|---------------------------|---------|---------------------------|---------|
| Predictor               | Estimate (95%<br>CI)      | P Value | Estimate (95%<br>CI)       | P Value | Estimate (95%<br>CI)      | P Value | Estimate (95%<br>CI)      | P Value |
| Highest tercile         | -0.01 (-0.04 –<br>0.01)   | 0.393   | 0.00 (-0.01 –<br>0.01)     | 0.854   | -0.01 (-0.04 –<br>0.02)   | 0.487   | -0.01 (-0.03 –<br>0.01)   | 0.433   |
| % Medicare<br>residents |                           |         |                            |         |                           |         |                           |         |
| Middle tercile          | -0.01 (-0.03 –<br>0.01)   | 0.426   | -0.01 (-0.01 –<br>0.00)    | 0.134   | -0.02 (-0.04 –<br>0.00)   | 0.045   | -0.02 (-0.03 –<br>0.00)   | 0.015   |
| Highest tercile         | -0.02 (-0.04 –<br>0.00)   | 0.038   | -0.01 (-0.02 –<br>0.00)    | 0.017   | -0.03 (-0.05 – –<br>0.01) | 0.008   | -0.02 (-0.04 – –<br>0.01) | 0.002   |
| % Medicaid<br>residents |                           |         |                            |         |                           |         |                           |         |
| Middle tercile          | 0.01 (-0.01 –<br>0.02)    | 0.490   | 0.00 (-0.01 –<br>0.01)     | 0.826   | 0.01 (-0.01 –<br>0.03)    | 0.297   | 0.01 (-0.01 –<br>0.02)    | 0.358   |

eTable 6. Association Between Staff Shortage Outcomes and Nursing Home Characteristics

| Predictor                       | Shortage of nursing staff |         | Shortage of clinical staff |         | Shortage of aides    |         | Shortage of other staff |         |
|---------------------------------|---------------------------|---------|----------------------------|---------|----------------------|---------|-------------------------|---------|
|                                 | Estimate (95% CI)         | P Value | Estimate (95% CI)          | P Value | Estimate (95% CI)    | P Value | Estimate (95% CI)       | P Value |
| Highest tercile                 | 0.03 (0.01 – 0.05)        | 0.005   | 0.00 (-0.01 – 0.01)        | 0.894   | 0.04 (0.01 – 0.06)   | 0.004   | 0.02 (0.00 – 0.03)      | 0.034   |
| Mean ADL score                  | 0.00 (0.00 – 0.00)        | 0.698   | 0.00 (0.00 – 0.00)         | 0.73    | 0.00 (-0.01 – 0.00)  | 0.101   | 0.00 (0.00 – 0.00)      | 0.388   |
| Multi-Facility Chain Membership | -0.02 (-0.03 – 0.00)      | 0.029   | 0.00 (-0.01 – 0.00)        | 0.446   | -0.01 (-0.03 – 0.01) | 0.187   | -0.01 (-0.02 – 0.00)    | 0.164   |
| Rural                           | 0.00 (-0.03 – 0.04)       | 0.771   | 0.02 (0.00 – 0.03)         | 0.072   | 0.03 (0 – 0.06)      | 0.092   | 0.02 (0.00 – 0.05)      | 0.072   |

Abbreviations: CI, confidence interval; ADL, Activities of daily living  
 Results presented as difference in percentage points.  
 Bonferroni correction was used for multiple comparisons.  
 Standard errors were adjusted for clustering at the level of the Hospital Referral Region.

eTable 7. Poisson Regression Estimates: Association Between COVID-19 Resident Outcomes and Ownership

|                                 | COVID confirmed cases, per 1,000 residents |         | COVID deaths, per 1,000 residents |         | All deaths, per 1,000 residents |         |
|---------------------------------|--------------------------------------------|---------|-----------------------------------|---------|---------------------------------|---------|
| Predictor                       | Risk estimate (95% CI)                     | P Value | Risk estimate (95% CI)            | P Value | Risk estimate (95% CI)          | P Value |
| Nursing Home Characteristics    |                                            |         |                                   |         |                                 |         |
| Ownership status                |                                            |         |                                   |         |                                 |         |
| For-profit                      | -0.05 (-0.3 – 0.2)                         | 1.000   | -0.02 (-0.3 – 0.3)                | 1.000   | -0.1 (-0.2 – 0.1)               | 0.635   |
| Non-profit                      | -0.2 (-0.4 – 0.1)                          | 0.465   | -0.1 (-0.4 – 0.2)                 | 1.000   | -0.1 (-0.2 – 0.1)               | 1.000   |
| Government                      | -0.4 (-0.8 – -0.04)                        | 0.022   | -0.1 (-0.5 – 0.4)                 | 1.000   | -0.1 (-0.3 – 0.1)               | 1.000   |
| Total beds                      |                                            |         |                                   |         |                                 |         |
| Middle tercile                  | 0.4 (0.2 – 0.5)                            | < 0.001 | 0.02 (-0.1 – 0.1)                 | 0.783   | 0.1 (0.1– 0.2)                  | 0.001   |
| Highest tercile                 | 0.4 (0.3 – 0.55)                           | < 0.001 | -0.1 (-0.2 – 0.1)                 | 0.271   | 0.3 (0.1 – 0.2)                 | < 0.001 |
| Occupancy rate                  | -0.03 (-0.04 – -0.03)                      | < 0.001 | -0.03 (-0.03 – -0.03)             | < 0.001 | -0.02 (-0.02 – -0.02)           | < 0.001 |
| Mean ADL score                  | 0.01 (-0.01 – 0.03)                        | 0.309   | 0.01 (-0.01 – 0.03)               | 0.394   | 0.03 (0.02 – 0.04)              | < 0.001 |
| Multi-Facility Chain Membership | 0.1 (-0.03 – 0.2)                          | 0.210   | 0.01 (-0.1 – 0.1)                 | 0.908   | -0.01 (-0.1 – 0.1)              | 0.684   |

eTable 7. Poisson Regression Estimates: Association Between COVID-19 Resident Outcomes and Ownership

| Predictor               | COVID confirmed cases, per 1,000 residents |         | COVID deaths, per 1,000 residents |         | All deaths, per 1,000 residents |         |
|-------------------------|--------------------------------------------|---------|-----------------------------------|---------|---------------------------------|---------|
|                         | Risk estimate (95% CI)                     | P Value | Risk estimate (95% CI)            | P Value | Risk estimate (95% CI)          | P Value |
| Rural                   | -0.7 (-1.1 – -0.3)                         | 0.001   | -0.4 (-0.9 – 0.01)                | 0.055   | -0.3 (-0.4 – -0.1)              | < 0.001 |
| Patient Characteristics |                                            |         |                                   |         |                                 |         |
| Patient age             | 0.01 (0.00 – 0.01)                         | 0.169   | 0.02 (0.01 – 0.03)                | < 0.001 | 0.02 (0.01 – 0.03)              | < 0.001 |
| % female residents      | 0.00 (-0.01 – 0.01)                        | 0.991   | 0.00 (-0.01 – 0.00)               | 0.489   | 0.00 (0.00 – 0.00)              | 0.488   |
| % white residents       |                                            |         |                                   |         |                                 |         |
| Middle tercile          | -0.2 (-0.3 – -0.1)                         | < 0.001 | -0.1 (-0.2 – 0.02)                | 0.131   | 0.00 (-0.1 – 0.1)               | 0.905   |
| Highest tercile         | -0.4 (-0.5 – -0.2)                         | < 0.001 | -0.1 (-0.20 – 0.1)                | 0.279   | 0.00 (-0.1 – 0.1)               | 0.939   |
| % Medicare residents    |                                            |         |                                   |         |                                 |         |
| Middle tercile          | 0.01 (-0.1 – 0.1)                          | 0.902   | 0.1 (0.01 – 0.2)                  | 0.030   | 0.03 (-0.03 – 0.1)              | 0.265   |
| Highest tercile         | -0.1 (-0.2 – 0.1)                          | 0.204   | -0.1 (-0.2 – 0.04)                | 0.227   | -0.04 (-0.1 – 0.03)             | 0.284   |
| % Medicaid residents    |                                            |         |                                   |         |                                 |         |



**eTable 7. Poisson Regression Estimates: Association Between COVID-19 Resident Outcomes and Ownership**

|                 | COVID confirmed cases, per 1,000 residents |         | COVID deaths, per 1,000 residents |         | All deaths, per 1,000 residents |         |
|-----------------|--------------------------------------------|---------|-----------------------------------|---------|---------------------------------|---------|
| Predictor       | Risk estimate (95% CI)                     | P Value | Risk estimate (95% CI)            | P Value | Risk estimate (95% CI)          | P Value |
| Middle tercile  | 0.1 (0.01 – 0.2)                           | 0.034   | 0.2 (0.1 – 0.3)                   | 0.002   | 0.00 (-0.1 – 0.1)               | 0.931   |
| Highest tercile | 0.1 (-0.02 – 0.2)                          | 0.120   | 0.2 (0.1 – 0.3)                   | < 0.001 | -0.02 (-0.1 – 0.1))             | 0.693   |

Abbreviations: CI, confidence interval; PPE, personal protective equipment; ADL, Activities of daily living  
 Bonferroni correction was used for multiple comparisons.  
 Standard errors were adjusted for clustering at the level of the Hospital Referral Region.

eTable 8. Logistic Regression Estimates: Association Between PPE Supply/Staff Shortage Outcomes and Ownership

| Outcome                           | For-profit          | P Value | Non-profit          | P Value | Government          | P Value |
|-----------------------------------|---------------------|---------|---------------------|---------|---------------------|---------|
|                                   | Odds Ratio (95% CI) |         | Odds Ratio (95% CI) |         | Odds Ratio (95% CI) |         |
| <i>PPE Supply Measures</i>        |                     |         |                     |         |                     |         |
| One-week supply of N95 masks      | 2.0 (1.2 – 3.2)     | 0.001   | 2.9 (1.7 – 5.0)     | < 0.001 | 3.7 (1.9 – 7.5)     | < 0.001 |
| One-week supply of surgical masks | 0.77 (0.3– 1.8)     | 1.000   | 1.7 (0.7 – 4.2)     | 0.724   | 1.8 (0.6 – 5.4)     | 0.801   |
| One-week supply of eye protection | 1.0 (0.5 – 2.2)     | 1.000   | 2.2 (0.9 – 5.2)     | 0.093   | 1.6 (0.6 – 4.4)     | 1.000   |
| One-week supply of gowns          | 3.8 (2.3 – 6.4)     | < 0.001 | 7.3 (4.3 – 12.5)    | < 0.001 | 6.5 (3.3 – 12.5)    | <0.001  |
| One-week supply of gloves         | 1.5 (0.6 – 3.3)     | 1.000   | 2.3 (0.9 – 5.7)     | 0.095   | 2.8 (0.9 – 8.2)     | 0.076   |
| One-week supply of hand sanitizer | 1.2 (0.6 – 2.8)     | 1.000   | 2.0 (0.8 – 5.0)     | 0.356   | 1.5 (0.4 – 5.3)     | 1.000   |
| <i>Staff Shortage Measures</i>    |                     |         |                     |         |                     |         |
| Shortage of nursing staff         | 1.4 (0.8 – 2.2)     | 0.528   | 1.1 (0.7 – 1.9)     | 1.000   | 1.8 (1.0 – 3.1)     | 0.056   |

eTable 8. Logistic Regression Estimates: Association Between PPE Supply/Staff Shortage Outcomes and Ownership

| Outcome                    | For-profit          | P Value | Non-profit          | P Value | Government          | P Value |
|----------------------------|---------------------|---------|---------------------|---------|---------------------|---------|
|                            | Odds Ratio (95% CI) |         | Odds Ratio (95% CI) |         | Odds Ratio (95% CI) |         |
| Shortage of clinical staff | 1.2 (0.5 – 2.8)     | 1.000   | 1.0 (0.4 – 2.7)     | 1.000   | 0.97 (0.3 – 3.2)    | 1.000   |
| Shortage of aides          | 1.3 (0.8 – 2.1)     | 0.965   | 1.1 (0.6 – 1.9)     | 1.000   | 1.4 (0.8 – 2.5)     | 0.631   |
| Shortage of other staff    | 1.2 (0.7 – 2.0)     | 1.000   | 1.1 (0.6 – 1.9)     | 1.000   | 1.4 (0.7 – 2.6)     | 1.000   |

Abbreviations: CI, confidence interval; PPE, personal protective equipment  
 Bonferroni correction was used for multiple comparisons.  
 Standard errors were adjusted for clustering at the level of the Hospital Referral Region.
